# Supplementary material
Source: HighWire-hosted journal article supplement (https://tobaccocontrol.bmj.com/content/32/4/501)
Supplement: inline-supplementary-material-1 [file inline-supplementary-material-1.pdf]

### Experimental Group: Tobacco-free Nicotine Claim

Now please read the message below and answer a few questions about Puff Bar e-cigarettes.

Puff Bar products are disposable e-cigarettes that do not require recharging or refilling. Puff Bar products are sold in many flavors such as tobacco, strawberry, cool mint, and lemon ice. All Puff Bar products contain tobacco-free nicotine. They do not contain tobacco or anything derived from tobacco.

This is what Puff Bar products look like:

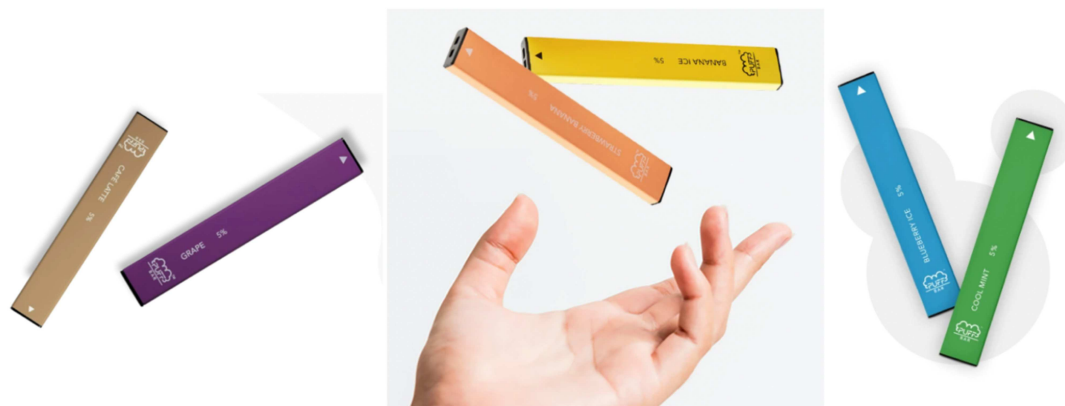

### Control Group: Regular Nicotine Claim

Now please read the message below and answer a few questions about Puff Bar e-cigarettes.

Puff Bar products are disposable e-cigarettes that do not require recharging or refilling. Puff Bar products are sold in many flavors such as tobacco, strawberry, cool mint, and lemon ice. All Puff Bar products contain nicotine.

This is what Puff Bar products look like:

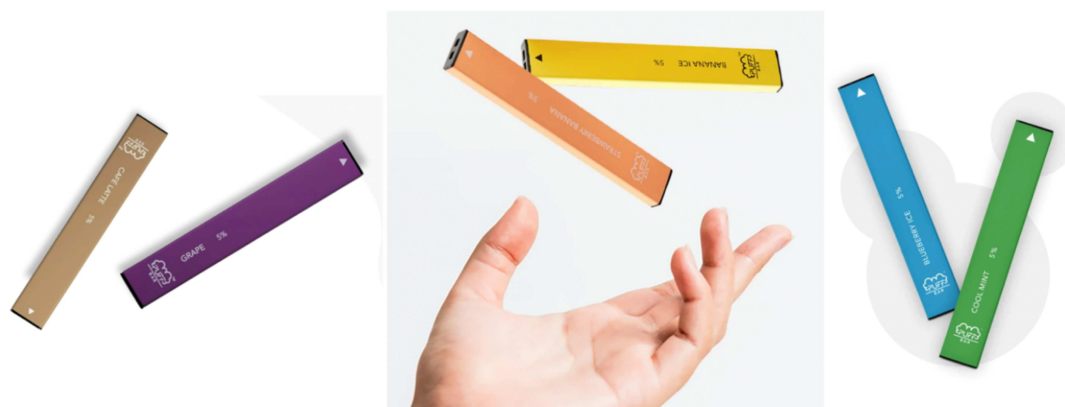

Source: <https://puffbar.com/>
